# Supplementary material for: No evidence of aberrant amyloid β and phosphorylated tau expression in herpes simplex virus‐infected neurons of the trigeminal ganglia and brain
Source: PubMed Central journal article supplement — Brain Pathol. 2021 Dec 16;32(4):e13044. doi: 10.1111/bpa.13044 (PMC9245940; doi:10.1111/bpa.13044), 2021-12-16
Supplement: BPA-32-e13044-s001.pdf [file BPA-32-e13044-s001.pdf]

1 **SUPPLEMENTARY DATA**

**Supplementary Table 1** Primers and probes used in this study

| Name            | Target                           | Sequence <sup>a</sup>                                |
|-----------------|----------------------------------|------------------------------------------------------|
| HSV-1 US4_Fw    | Human herpesvirus 1 <i>US4</i>   | TCCTSGTTCCTMACKGCCTCCC                               |
| HSV-1 US4_Rv    | Human herpesvirus 1 <i>US4</i>   | CGTCTGGACCAACCGCCACACAGGT                            |
| HSV-1 US4_probe | Human herpesvirus 1 <i>US4</i>   | <i>FAM</i> -GCAGICAYACGTAACGCACGCT- <i>BHQ1</i>      |
| HSV-1 LAT_Fw    | Human herpesvirus 1 <i>LAT</i>   | CCCACGTA CTCCAAGAAGGC                                |
| HSV-1 LAT_Rv    | Human herpesvirus 1 <i>LAT</i>   | AGACCCAAGCATAGAGAGCCAG                               |
| HSV-1 LAT_probe | Human herpesvirus 1 <i>LAT</i>   | <i>FAM</i> -CCCACCCCGCCTGTGTTTTTGTG- <i>BHQ1</i>     |
| VZV ORF38_Fw    | Human herpesvirus 3 <i>ORF38</i> | AAGTTC CCCCCGTTTCGC                                  |
| VZV ORF38_Rv    | Human herpesvirus 3 <i>ORF38</i> | CCGCAACA ACTGCAGTATATATCGTCTCA                       |
| VZV ORF38_probe | Human herpesvirus 3 <i>ORF38</i> | <i>FAM</i> -TGGACTTGAAGATGAACTTAATGAAGC- <i>BHQ1</i> |
| HMBS_Fw         | Homo sapiens <i>HMBS</i>         | GCCTGCAGTTTGAAATCAGTG                                |
| HMBS_Rv         | Homo sapiens <i>HMBS</i>         | CGGGACGGGCTTTAGCTA                                   |
| HMBS_probe      | Homo sapiens <i>HMBS</i>         | <i>FAM</i> -CGCAGGCACTCGTACTGCTCGCT- <i>BHQ1</i>     |
| ApoE2_Fw        | Homo sapiens <i>APOE2</i>        | GCGGACATGGAGGACGTGT                                  |
| ApoE2_Rv        | Homo sapiens <i>APOE2</i>        | CCTGGTACTG CCGAGGCA                                  |
| ApoE3_Fw        | Homo sapiens <i>APOE3</i>        | CGGACATGGAGGACGTGT                                   |
| ApoE3_Rv        | Homo sapiens <i>APOE3</i>        | CTGGTACTG CCGAGGCG                                   |
| ApoE4_Fw        | Homo sapiens <i>APOE4</i>        | CGGACATGGAGGACGTGC                                   |
| ApoE4_Rv        | Homo sapiens <i>APOE4</i>        | CTGGTACTG CCGAGGCG                                   |
| ApoE_Probe      | Homo sapiens <i>APOE</i>         | <i>FAM</i> -CAGCTCCTCGGTGCTCTGGC- <i>BHQ1</i>        |
| ApoE_seq1       | Homo sapiens <i>APOE</i>         | AGCCCTTCTCCCCGCCTCCCACTGT                            |
| ApoE_seq2       | Homo sapiens <i>APOE</i>         | CTCCGCCACCTGCTCCTTCACCTCG                            |

<sup>a</sup>5' and 3'-modifications of TaqMan probes are indicated. *FAM* 6-Carboxyfluorescein, *BHQ1* black hole quencher 1

2

3

**Supplementary Table 2** FFPE TG samples used in this study

| Subject | Age <sup>a</sup> | Gender <sup>b</sup> | PMI <sup>c</sup> | Cause of death                        | Neurological disease | HSV-1 status <sup>d</sup> |
|---------|------------------|---------------------|------------------|---------------------------------------|----------------------|---------------------------|
| 1       | 81               | F                   | 3:35             | Cachexia and dehydration              | Alzheimer's disease  | negative                  |
| 2       | 82               | F                   | 5:55             | Cardiac arrest                        | Alzheimer's disease  | negative                  |
| 3       | 89               | F                   | 4:30             | Peritonitis                           | Alzheimer's disease  | positive                  |
| 4       | 87               | F                   | 8:10             | Uremia by dehydration                 | Alzheimer's disease  | positive                  |
| 5       | 86               | F                   | 5:15             | Cachexia and dehydration              | Alzheimer's disease  | positive                  |
| 6       | 81               | M                   | 8:21             | Euthanasia                            | Parkinson's disease  | positive                  |
| 7       | 62               | F                   | 12:35            | Cachexia with pulmonary insufficiency | Multiple sclerosis   | positive                  |
| 8       | 80               | F                   | 9:30             | Cardiac arrest                        | Bipolar disorder     | positive                  |
| 9       | 103              | F                   | 6:35             | Dehydration and pneumonia             | Tauopathy            | positive                  |
| 10      | 89               | M                   | 6:50             | Urosepsis                             | non-demented control | positive                  |

<sup>a</sup>Age in years; <sup>b</sup>F, female; M, male; <sup>c</sup>PMI, post-mortem interval; <sup>d</sup>HSV-1 infection status based on serology and HSV-1 LAT ISH

4

5

**Supplementary Table 3** TBI patients used in this study

| Subject | Age <sup>a</sup> | Gender <sup>b</sup> | Interval TBI – death |
|---------|------------------|---------------------|----------------------|
| 1       | 84               | M                   | 0 days (acute)       |
| 2       | 48               | M                   | 7 days               |
| 3       | 13               | F                   | 11                   |

<sup>a</sup>Age in years; <sup>b</sup>F, female; M, male

6

7

**Supplementary Table 4** FFPE AD samples used in this study

| Subject | Age <sup>a</sup> | Gender <sup>b</sup> | PMI <sup>c</sup> | Cause of death                      | Neurological disease | HSV status <sup>d</sup> |
|---------|------------------|---------------------|------------------|-------------------------------------|----------------------|-------------------------|
| 1       | 88               | M                   | 4:40             | Cachexia and dehydration            | Alzheimer's disease  | positive                |
| 2       | 74               | M                   | 8:00             | Dehydration by possible<br>cystitis | Alzheimer's disease  | positive                |
| 3       | 86               | M                   | 05:10            | Cachexia and dehydration            | Alzheimer's disease  | positive                |

<sup>a</sup>Age in years; <sup>b</sup>F, female; M, male; <sup>c</sup>PMI, post-mortem interval; <sup>d</sup>HSV infection status based on HSV-specific IgG serology data

11 **SUPPLEMENTARY FIGURE 1**

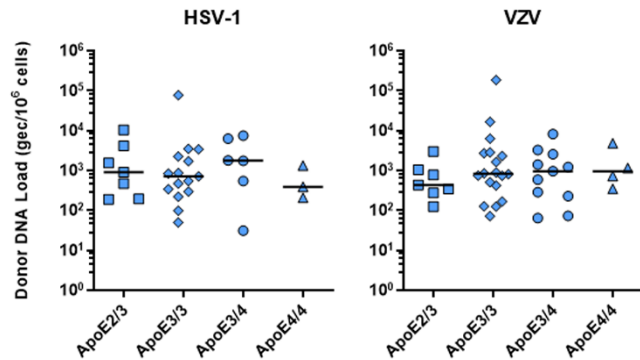

12

13

14 **Supplementary Fig. 1** Quantification of latent HSV-1 and VZV DNA load in human TG  
15 stratified on *APOE* genotype. HSV-1- and VZV-specific qPCR and *APOE* genotyping was  
16 performed on DNA extracted from the trigeminal ganglia (TG) of AD patients and controls.

17

18 **SUPPLEMENTARY FIGURE 2**

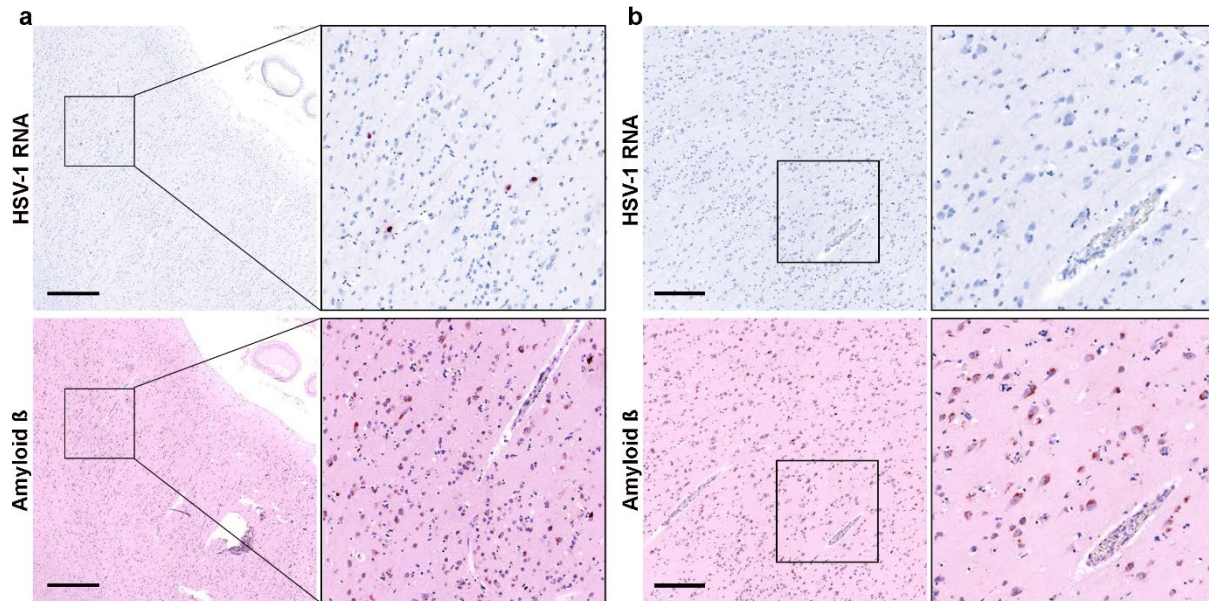

19

20 **Supplementary Fig. 2** Intra-neuronal accumulation of A $\beta$  protein is not restricted to  
21 areas of HSV-1 infection in brains of HSE patients. Consecutive slides were stained for  
22 HSV-1 RNA by ISH and A $\beta$  by IHC. A $\beta$  can be seen in areas with HSV-1 RNA (**a**) and in  
23 areas without HSV-1 RNA (**b**). Data shown for HSE donor 5. Scale bar: 500  $\mu$ m (**a**) and  
24 250  $\mu$ m (**b**).

25

26 SUPPLEMENTARY FIGURE 3

27

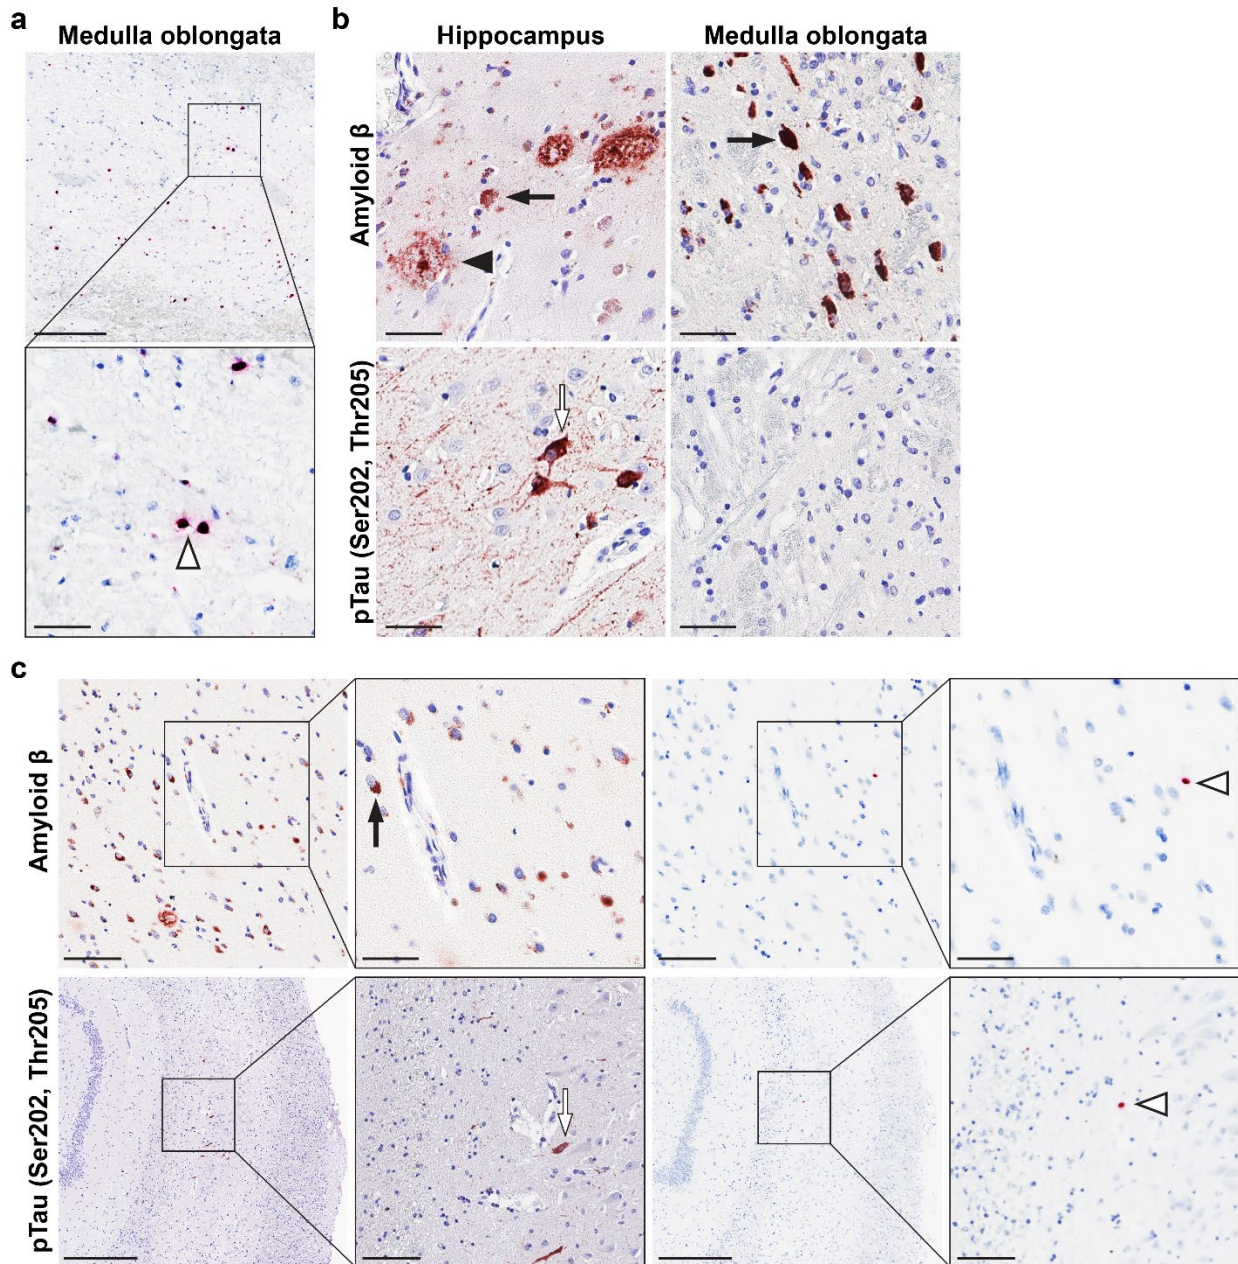

28

29 **Supplementary Fig. 3** Lytic VZV infection is not associated with A $\beta$  plaques or NFT in  
30 brain of a VZV encephalitis patient. **a** Brain section stained for VZV RNA by ISH. Box  
31 indicates area shown at higher magnification. Open arrowhead indicates examples of  
32 VZV RNA-expressing cells. Scale bars indicate 250  $\mu$ m (top) and 50  $\mu$ m (bottom). **b** Brain

33 sections IHC stained for A $\beta$  and pTau (Ser<sup>202</sup>/Thr<sup>205</sup>). Scale bars indicate 50  $\mu$ m. **c**  
34 Consecutive brain sections were IHC stained for A $\beta$  and pTau (Ser<sup>202</sup>/Thr<sup>205</sup>) or stained  
35 for HSV-1 RNA by ISH. Boxes indicate areas shown at higher magnification. Filled arrow  
36 indicates intracellular A $\beta$  protein, open arrow indicates NFT and open arrowhead  
37 indicates VZV RNA-expressing cells. Scale bars indicate 50  $\mu$ m (A $\beta$ , high magnification),  
38 100  $\mu$ m (A $\beta$ , low magnification; pTau high magnification) and 500  $\mu$ m (pTau, low  
39 magnification).

40



41 **SUPPLEMENTARY FIGURE 4**

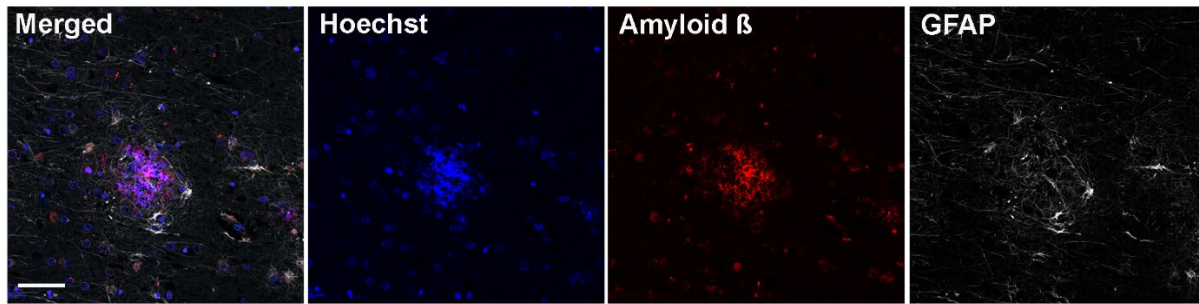

42

43 **Supplementary Fig. 4** Prominent GFAP staining of astrocytes interacting with A $\beta$   
44 plaques brain of an AD patient with concurrent HSE. IF staining for A $\beta$  (red), GFAP (white)  
45 and nuclei (Hoechst-33342; blue). Scale bar: 50  $\mu$ m.

46

47 **SUPPLEMENTARY FIGURE 5**

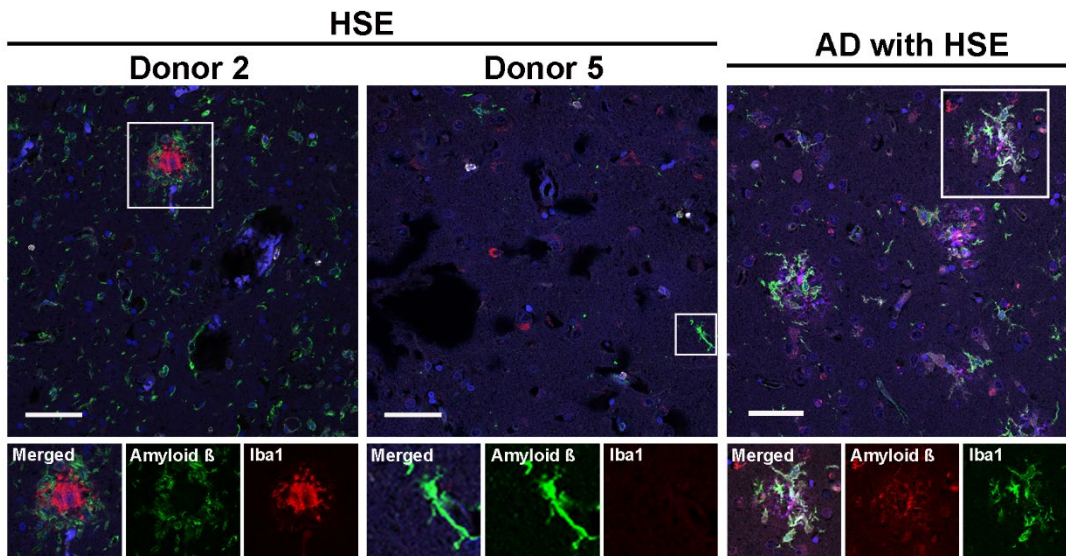

48

49 **Supplementary Fig. 5** Microglia morphology and density in the brain of HSE patients  
50 and AD patient with HSE. Brain tissue sections were IF stained for A $\beta$  (red), Iba1 (green)  
51 and nuclei (Hoechst-33342; blue). Boxes indicate areas shown at higher magnification.  
52 Scale bar: 50  $\mu$ m.

53
